# Supplementary material
Source: ML conference proceedings conference paper supplement (https://openreview.net/forum?id=BE2hok0lES)
Supplement: supplementary_material [file attachment]

## 1 A 6+T Parametrization

2 The algorithm followed for the distance-based loss function optimization is detailed below.

**Algorithm 1** 6+T parametrization used in UMD-fit

---

```

1: optim = LBFGS(params=[euler, trans, torsions], lr=0.5)
2: for i in range(max_steps)
3:     def closure():
4:         optim.zero_grad()
5:         coords = coords + trans
6:         rot_mat = rot_from_euler(euler)
7:         coords = einsum('rc,nc->nr', rot_mat, coords - com) + com
8:         aux_coords = coords.clone()
9:         for (i,j,k,l), value in zip(torsion_idxes, torsion_values):
10:            coords = update_dihedral(coords, idxs=[i,j,k,l], value=value)
11:        coords = kabsch(coords, aux_coords)
12:        loss = loss_func(coords, pocket_coords, pred_dist_mat)
13:        loss.backward()
14:    return loss
15: loss = optimizer.step(closure)

```

---

3 More details on the performance of  $6 + T$  alone and the stereochemistry preservation in UMD-fit  
4 relative to Uni-Mol Docking are shown in Table 1. The difference can be largely attributed to higher  
5 quality conformers in the distance optimization post-processing, but not improved modelling by the  
6 ligand processing module in Uni-Mol. We hypothesize this might be explained by incorrect training  
7 data (wrong stereochemistry) in original Uni-Mol training, thus yielding a model less sensitive to  
8 those features and specific geometries. Further work might involve retraining the original model with  
9 correct input features.

Table 1: Performance for different inference strategies for Uni-Mol Docking in the CASF-2016 test set

| Strategy | RMSD ( $\downarrow$ , Å) | symRMSD ( $\downarrow$ , Å) | % $\leq$ symRMSD ( $\uparrow$ ) |       |       |       |       |       |
|----------|--------------------------|-----------------------------|---------------------------------|-------|-------|-------|-------|-------|
|          |                          |                             | 0.5Å                            | 1.0Å  | 1.5Å  | 2.0Å  | 3.0Å  | 5.0Å  |
| Baseline | 1.67                     | 1.54                        | 14.74                           | 56.14 | 72.98 | 81.05 | 87.72 | 94.39 |
| 6+T      | 1.81                     | 1.65                        | 10.18                           | 45.96 | 70.53 | 79.29 | 85.61 | 93.68 |
| UMD-fit  | 1.75                     | 1.57                        | 12.63                           | 51.58 | 72.28 | 80.70 | 87.72 | 94.03 |
